# Supplementary material for: Alginate-Chitosan Coated Nanoliposomes as Effective Delivery Systems for Bamboo Leaf Flavonoids: Characterization, In Vitro Release, Skin Permeation and Anti-Senescence Activity
Source: MDPI journal article supplement (doi:10.3390/antiox11051024), 2022-05-23
Supplement: s1 [file s1]

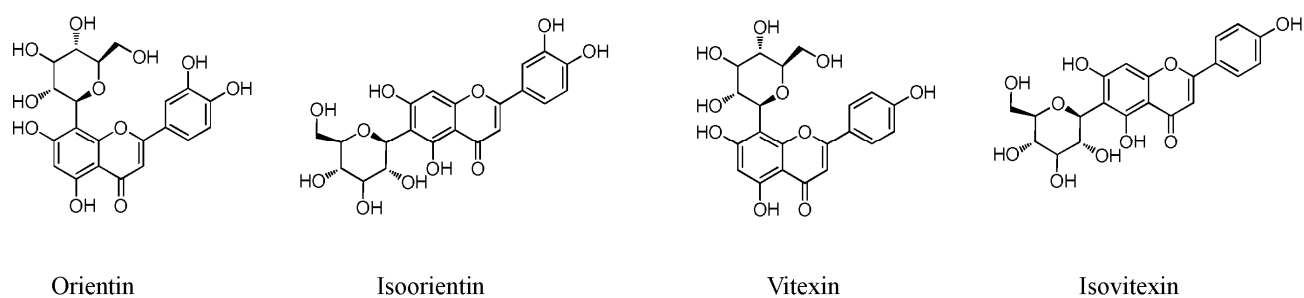

**Supplementary Figure S1** The chemical structure of orientin, isoorientin, vitexin and isovitexin.

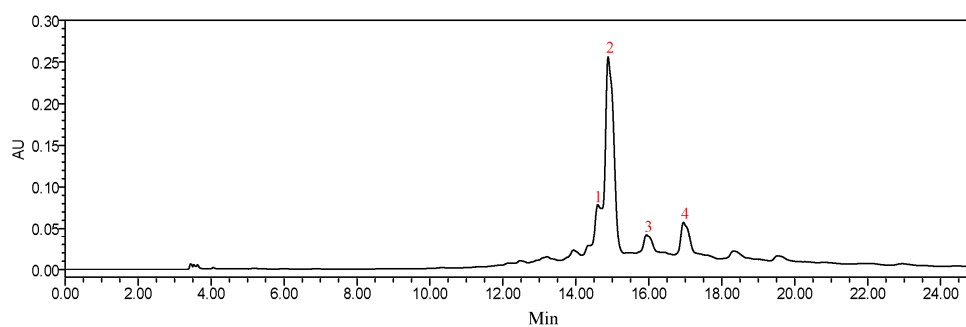

| Peak | Flavonoid compound | Retention time | Area    | Height | % Area |
|------|--------------------|----------------|---------|--------|--------|
| 1    | isoorientin        | 14.680         | 1028577 | 63027  | 10.64  |
| 2    | orientin           | 14.965         | 3956320 | 214205 | 40.92  |
| 3    | isovitexin         | 16.019         | 1511659 | 34918  | 15.63  |
| 4    | vitexin            | 17.033         | 1302318 | 45940  | 13.47  |

**Supplementary Figure S2** Liquid chromatogram of bamboo leaf flavonoids prepared in our laboratory.
